# Supplementary material for: Use of Mass Spectrometry to Determine the Diversity of Toxins Produced by Gambierdiscus and Fukuyoa Species from Balearic Islands and Crete (Mediterranean Sea) and the Canary Islands (Northeast Atlantic)
Source: PubMed Central journal article supplement (PMC7291038; doi:10.3390/toxins12050305), 2020-05-07
Supplement: toxins-12-00305-s001.pdf [file toxins-12-00305-s001.pdf]

# Supplementary material for: Use of Mass Spectrometry to Determine the Diversity of Toxins Produced by *Gambierdiscus* and *Fukuyoa* Species from Balearic Islands and Crete (Mediterranean Sea) and the Canary Islands (Northeast Atlantic)

Pablo Estevez, Manoëlla Sibat, José Manuel Leão-Martins, Angels Tudó, Maria Rambla-Alegre, Katerina Aligizaki, Jorge Diogène, Ana Gago-Martinez and Philipp Hess

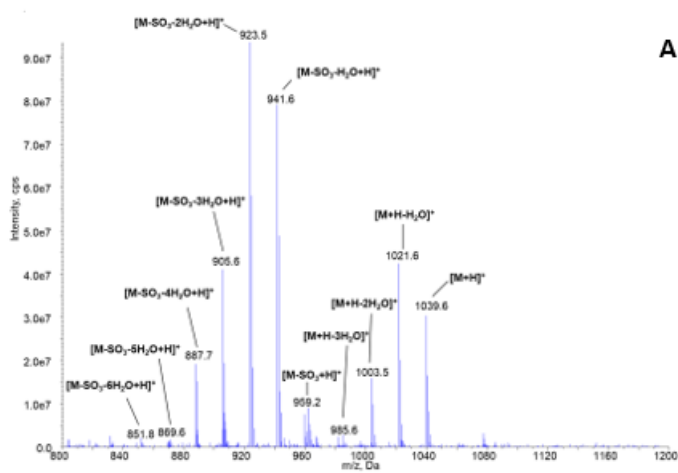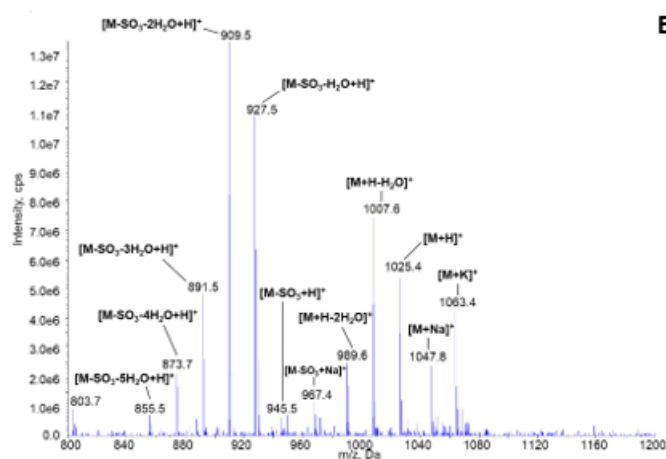

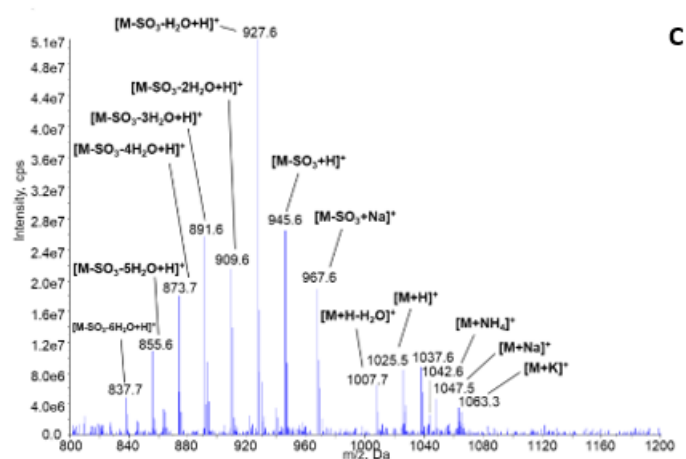

**Figure S1.** LC-MS/MS Full scan analysis of: (A) MTX3 from *G. australes*; (B) gambierone from *Gambierdiscus* sp; (C) putative gambierone analogue from *G. australes*.

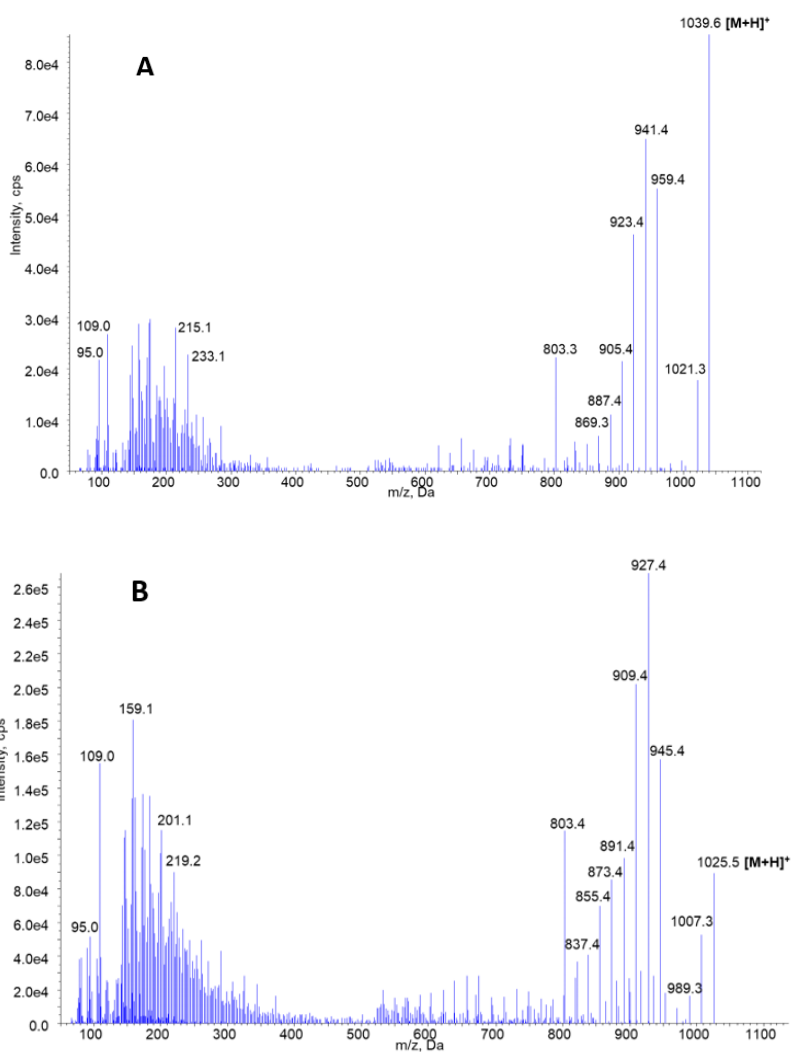

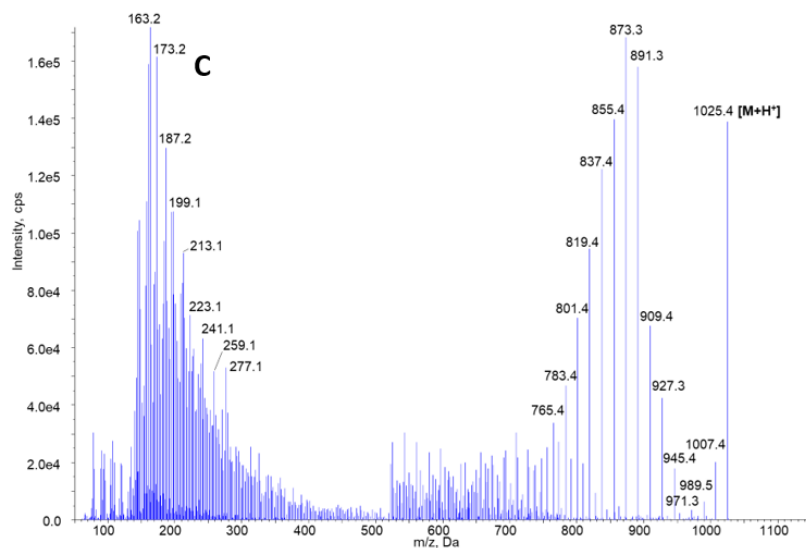

**Figure S2.** LC-MS/MS spectra resulting from enhanced product ion scan at an average CE of 20, 40 and 60 eV of: (A) MTX3 from *G. australes*; (B) gambierone from *Gambierdiscus sp*; (C) putative gambierone analogue from *G. australes*.

**Table S1.** Accurate mass measurements using LC-HRMS full scan analysis in ESI<sup>-</sup> and ESI<sup>+</sup> mode for MTX3.

| Specie              | Sample ID       | Injection N°            | ESI <sup>+</sup> MTX3               |                         |                                   |                         | Retention time (min)    | ESI <sup>-</sup> MTX3   |                    |                      |
|---------------------|-----------------|-------------------------|-------------------------------------|-------------------------|-----------------------------------|-------------------------|-------------------------|-------------------------|--------------------|----------------------|
|                     |                 |                         | Ion                                 |                         |                                   |                         |                         | Retention time (min)    | Ion                |                      |
|                     |                 |                         | [M+H-H <sub>2</sub> O] <sup>+</sup> | [M+H] <sup>+</sup>      | [M+NH <sub>4</sub> ] <sup>+</sup> | [M+Na] <sup>+</sup>     |                         |                         | [M-H] <sup>-</sup> | Retention time (min) |
| <i>G. australes</i> | IRTA-SMN-17-189 | R1                      | 1021.4835 (Δppm = +1.0)             | 1039.4957 (Δppm = +2.5) | 1056.5207 (Δppm = +1.0)           | 1061.4730 (Δppm = -1.9) | 7.67                    | 1037.4789 (Δppm = +0.4) | 7.66               |                      |
|                     |                 | R2                      | 1021.4832 (Δppm = +0.7)             | 1039.4956 (Δppm = +2.4) | 1056.5196 (Δppm = +0.0)           | 1061.4734 (Δppm = -1.5) | 7.66                    | 1037.4791 (Δppm = +0.6) | 7.66               |                      |
|                     |                 | R3                      | 1021.4835 (Δppm = +1.0)             | 1039.4959 (Δppm = +2.7) | 1056.5207 (Δppm = +1.0)           | 1061.4739 (Δppm = -1.0) | 7.66                    | 1037.4791 (Δppm = +0.6) | 7.66               |                      |
|                     | IRTA-SMN-17-253 | R1                      | 1021.4840 (Δppm = +1.5)             | 1039.4963 (Δppm = +3.1) | 1056.5211 (Δppm = +1.4)           | 1061.4744 (Δppm = -0.6) | 7.63                    | 1037.4785 (Δppm = +0.0) | 7.63               |                      |
|                     |                 | R2                      | 1021.4845 (Δppm = +2.0)             | 1039.4969 (Δppm = +3.7) | 1056.5220 (Δppm = +2.3)           | 1061.4741 (Δppm = -0.8) | 7.61                    | 1037.4791 (Δppm = +0.6) | 7.61               |                      |
|                     |                 | R3                      | 1021.4843 (Δppm = +1.8)             | 1039.4966 (Δppm = +3.4) | 1056.5214 (Δppm = +1.7)           | 1061.4739 (Δppm = -1.0) | 7.61                    | 1037.4792 (Δppm = +0.7) | 7.63               |                      |
|                     | IRTA-SMN-17-244 | R1                      | 1021.4841 (Δppm = +1.6)             | 1039.4966 (Δppm = +3.4) | 1056.5213 (Δppm = +1.6)           | 1061.4740 (Δppm = -0.9) | 7.67                    | 1037.4788 (Δppm = +0.3) | 7.63               |                      |
|                     |                 | R2                      | 1021.4843 (Δppm = +1.8)             | 1039.4964 (Δppm = +3.2) | 1056.5212 (Δppm = +1.5)           | 1061.4746 (Δppm = -0.4) | 7.67                    | 1037.4793 (Δppm = +0.8) | 7.64               |                      |
|                     |                 | R3                      | 1021.4842 (Δppm = +1.7)             | 1039.4966 (Δppm = +3.4) | 1056.5212 (Δppm = +1.5)           | 1061.4744 (Δppm = -0.6) | 7.65                    | 1037.4791 (Δppm = +0.6) | 7.64               |                      |
|                     | IRTA-SMN-17-162 | R1                      | 1021.4839 (Δppm = +1.4)             | 1039.4962 (Δppm = +3.0) | 1056.5210 (Δppm = +1.3)           | 1061.4736 (Δppm = -1.3) | 7.62                    | 1037.4788 (Δppm = +0.3) | 7.66               |                      |
|                     |                 | R2                      | 1021.4840 (Δppm = +1.5)             | 1039.4962 (Δppm = +3.0) | 1056.5212 (Δppm = +1.5)           | 1061.4737 (Δppm = -1.2) | 7.66                    | 1037.4787 (Δppm = +0.2) | 7.66               |                      |
|                     |                 | R3                      | 1021.4838 (Δppm = +1.3)             | 1039.4962 (Δppm = +3.0) | 1056.5213 (Δppm = +1.6)           | 1061.4737 (Δppm = -1.2) | 7.65                    | 1037.4790 (Δppm = +0.5) | 7.65               |                      |
| IRTA-SMN-17-164     | R1              | 1021.4841 (Δppm = +1.6) | 1039.4964 (Δppm = +3.2)             | 1056.5214 (Δppm = +1.7) | 1061.4742 (Δppm = -0.8)           | 7.67                    | 1037.4790 (Δppm = +0.5) | 7.65                    |                    |                      |
|                     | R2              | 1021.4843 (Δppm = +1.8) | 1039.4965 (Δppm = +3.3)             | 1056.5215 (Δppm = +1.8) | 1061.4741 (Δppm = -0.8)           | 7.66                    | 1037.4791 (Δppm = +0.6) | 7.65                    |                    |                      |
|                     | R3              | 1021.4837 (Δppm = +1.2) | 1039.4961 (Δppm = +2.9)             | 1056.5209 (Δppm = +1.2) | 1061.4741 (Δppm = -0.8)           | 7.65                    | 1037.4790 (Δppm = +0.5) | 7.64                    |                    |                      |
| IRTA-SMN-17-271     | R1              | 1021.4839 (Δppm = +1.4) | 1039.4962 (Δppm = +3.0)             | 1056.5213 (Δppm = +1.6) | 1061.4723 (Δppm = -2.5)           | 7.62                    | 1037.4790 (Δppm = +0.5) | 7.62                    |                    |                      |

|                       |                 |    |                                  |                                  |                                  |                                  |      |                                  |      |
|-----------------------|-----------------|----|----------------------------------|----------------------------------|----------------------------------|----------------------------------|------|----------------------------------|------|
|                       |                 | R2 | 1021.4844 ( $\Delta$ ppm = +1.9) | 1039.4966 ( $\Delta$ ppm = +3.4) | 1056.5215 ( $\Delta$ ppm = +1.8) | 1061.4730 ( $\Delta$ ppm = -1.9) | 7.62 | 1037.4792 ( $\Delta$ ppm = +0.7) | 7.62 |
|                       |                 | R3 | 1021.4840 ( $\Delta$ ppm = +1.5) | 1039.4962 ( $\Delta$ ppm = +3.0) | 1056.5214 ( $\Delta$ ppm = +1.7) | 1061.4729 ( $\Delta$ ppm = -2.0) | 7.62 | 1037.4790 ( $\Delta$ ppm = +0.5) | 7.62 |
| <i>G. excentricus</i> | IRTA-SMN-17-407 | R1 | n.d.                             | n.d.                             | n.d.                             | n.d.                             | n.d. | n.d.                             | n.d. |
|                       |                 | R2 | n.d.                             | n.d.                             | n.d.                             | n.d.                             | n.d. | n.d.                             | n.d. |
|                       |                 | R3 | n.d.                             | n.d.                             | n.d.                             | n.d.                             | n.d. | n.d.                             | n.d. |
|                       |                 | R1 | n.d.                             | n.d.                             | n.d.                             | n.d.                             | n.d. | 1037.4769 ( $\Delta$ ppm = -1.5) | 7.67 |
| <i>F. paulensis</i>   | IRTA-SMN-17-209 | R2 | 1021.4907 ( $\Delta$ ppm = +8.0) | 1039.4931 ( $\Delta$ ppm = +0.0) | n.d.                             | n.d.                             | 7.68 | 1037.4769 ( $\Delta$ ppm = -1.5) | 7.65 |
|                       |                 | R3 | 1021.4781 ( $\Delta$ ppm = -4.3) | 1039.4908 ( $\Delta$ ppm = -2.2) | n.d.                             | n.d.                             | 7.66 | 1037.4765 ( $\Delta$ ppm = -1.9) | 7.65 |
|                       |                 | R1 | 1021.4819 ( $\Delta$ ppm = -0.6) | 1039.4925 ( $\Delta$ ppm = -0.6) | n.d.                             | n.d.                             | 7.65 | 1037.4768 ( $\Delta$ ppm = -1.6) | 7.64 |
| <i>G. sp 2</i>        | 0010G-CR-CCAUTH | R2 | n.d.                             | n.d.                             | n.d.                             | n.d.                             | n.d. | 1037.4771 ( $\Delta$ ppm = -1.3) | 7.65 |
|                       |                 | R3 | n.d.                             | n.d.                             | n.d.                             | n.d.                             | n.d. | 1037.4769 ( $\Delta$ ppm = -1.5) | 7.64 |

---

**Table S2.** Accurate mass measurements using LC-HRMS full scan analysis in ESI<sup>-</sup> and ESI<sup>+</sup> mode for gambierone.

| Specie                | Sample ID       | Injection N° | ESI <sup>+</sup> Gambierone         |                         |                                   |                         | ESI <sup>-</sup> Gambierone |                         |                      |
|-----------------------|-----------------|--------------|-------------------------------------|-------------------------|-----------------------------------|-------------------------|-----------------------------|-------------------------|----------------------|
|                       |                 |              | [M+H-H <sub>2</sub> O] <sup>+</sup> | [M+H] <sup>+</sup>      | [M+NH <sub>4</sub> ] <sup>+</sup> | [M+Na] <sup>+</sup>     | Retention time (min)        | Ion [M-H] <sup>-</sup>  | Retention time (min) |
| <i>G. australes</i>   | IRTA-SMN-17-189 | R1           | n.d.                                | n.d.                    | n.d.                              | n.d.                    | n.d.                        | n.d.                    | n.d.                 |
|                       |                 | R2           | n.d.                                | n.d.                    | n.d.                              | n.d.                    | n.d.                        | n.d.                    | n.d.                 |
|                       |                 | R3           | n.d.                                | n.d.                    | n.d.                              | n.d.                    | n.d.                        | n.d.                    | n.d.                 |
|                       | IRTA-SMN-17-253 | R1           | n.d.                                | n.d.                    | n.d.                              | n.d.                    | n.d.                        | n.d.                    | n.d.                 |
|                       |                 | R2           | n.d.                                | n.d.                    | n.d.                              | n.d.                    | n.d.                        | n.d.                    | n.d.                 |
|                       |                 | R3           | n.d.                                | n.d.                    | n.d.                              | n.d.                    | n.d.                        | n.d.                    | n.d.                 |
|                       | IRTA-SMN-17-244 | R1           | n.d.                                | n.d.                    | n.d.                              | n.d.                    | n.d.                        | n.d.                    | n.d.                 |
|                       |                 | R2           | n.d.                                | n.d.                    | n.d.                              | n.d.                    | n.d.                        | n.d.                    | n.d.                 |
|                       |                 | R3           | n.d.                                | n.d.                    | n.d.                              | n.d.                    | n.d.                        | n.d.                    | n.d.                 |
|                       | IRTA-SMN-17-162 | R1           | n.d.                                | n.d.                    | n.d.                              | n.d.                    | n.d.                        | n.d.                    | n.d.                 |
|                       |                 | R2           | n.d.                                | n.d.                    | n.d.                              | n.d.                    | n.d.                        | n.d.                    | n.d.                 |
|                       |                 | R3           | n.d.                                | n.d.                    | n.d.                              | n.d.                    | n.d.                        | n.d.                    | n.d.                 |
|                       | IRTA-SMN-17-164 | R1           | n.d.                                | n.d.                    | n.d.                              | n.d.                    | n.d.                        | n.d.                    | n.d.                 |
|                       |                 | R2           | n.d.                                | n.d.                    | n.d.                              | n.d.                    | n.d.                        | n.d.                    | n.d.                 |
|                       |                 | R3           | n.d.                                | n.d.                    | n.d.                              | n.d.                    | n.d.                        | n.d.                    | n.d.                 |
|                       | IRTA-SMN-17-271 | R1           | n.d.                                | n.d.                    | n.d.                              | n.d.                    | n.d.                        | n.d.                    | n.d.                 |
|                       |                 | R2           | n.d.                                | n.d.                    | n.d.                              | n.d.                    | n.d.                        | n.d.                    | n.d.                 |
|                       |                 | R3           | n.d.                                | n.d.                    | n.d.                              | n.d.                    | n.d.                        | n.d.                    | n.d.                 |
| <i>G. excentricus</i> | IRTA-SMN-17-407 | R1           | n.d.                                | n.d.                    | n.d.                              | n.d.                    | n.d.                        | n.d.                    | n.d.                 |
|                       |                 | R2           | n.d.                                | n.d.                    | n.d.                              | n.d.                    | n.d.                        | n.d.                    | n.d.                 |
|                       |                 | R3           | n.d.                                | n.d.                    | n.d.                              | n.d.                    | n.d.                        | n.d.                    | n.d.                 |
| <i>F. paulensis</i>   | IRTA-SMN-17-209 | R1           | n.d.                                | n.d.                    | n.d.                              | n.d.                    | n.d.                        | n.d.                    | n.d.                 |
|                       |                 | R2           | n.d.                                | n.d.                    | n.d.                              | n.d.                    | n.d.                        | n.d.                    | n.d.                 |
|                       |                 | R3           | n.d.                                | n.d.                    | n.d.                              | n.d.                    | n.d.                        | n.d.                    | n.d.                 |
| <i>G. sp 2</i>        | 0010G-CR-CCAUTH | R1           | 1007.4687 (Δppm = +1.8)             | 1025.4809 (Δppm = +3.4) | 1042.5059 (Δppm = +1.8)           | 1047.4582 (Δppm = -1.1) | 7.34                        | 1023.4634 (Δppm = +0.5) | 7.37                 |
|                       |                 | R2           | 1007.4695 (Δppm = +2.6)             | 1025.4815 (Δppm = +4.0) | 1042.5066 (Δppm = +2.5)           | 1047.4589 (Δppm = -0.5) | 7.39                        | 1023.4635 (Δppm = +0.6) | 7.37                 |
|                       |                 | R3           | 1007.4687 (Δppm = +1.8)             | 1025.4810 (Δppm = +3.5) | 1042.5060 (Δppm = +1.9)           | 1047.4580 (Δppm = -1.3) | 7.39                        | 1023.4630 (Δppm = +0.1) | 7.37                 |

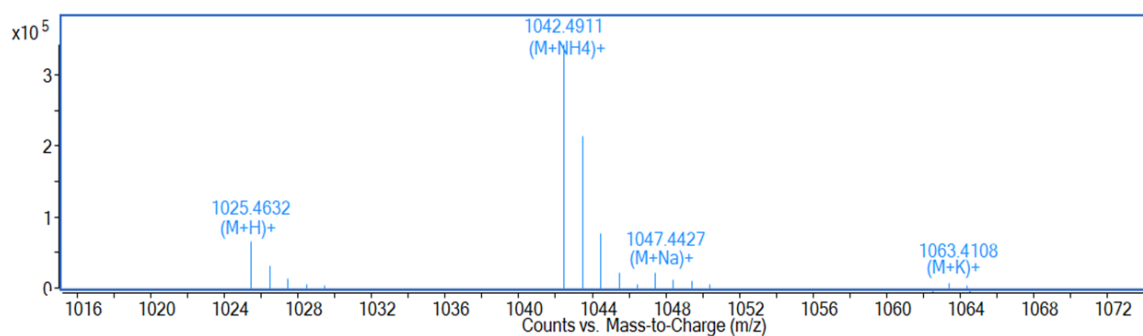

**Figure S3.** Putative gambierone analogue detected in LC-HRMS using the Find by Molecular Feature (FMF) algorithm in *G. australes* at 6.08 min.

**Table S3.**  $m/z$  measured values for the putative gambierone analogue and  $\Delta$  ppm calculated in base of gambierone theoretical values.

| Ion                               | $m/z$     |             | $\Delta$ ppm |
|-----------------------------------|-----------|-------------|--------------|
|                                   | Measured  | Theoretical |              |
| [M+H] <sup>+</sup>                | 1025.4632 | 1025.4774   | -13.8        |
| [M+NH <sub>4</sub> ] <sup>+</sup> | 1042.4911 | 1042.5040   | -12.4        |
| [M+Na] <sup>+</sup>               | 1047.4427 | 1047.4594   | -15.9        |
| [M+K] <sup>+</sup>                | 1063.4108 | 1063.4333   | -21.2        |

  

| Ion                               | $m/z$     |             | $\Delta$ ppm |
|-----------------------------------|-----------|-------------|--------------|
|                                   | Measured  | Theoretical |              |
| [M-H] <sup>-</sup>                | 1023.4449 | 1023.4629   | -17.6        |
| [HOSO <sub>3</sub> ] <sup>-</sup> | 96.9610   | 96.9601     | +9.3         |

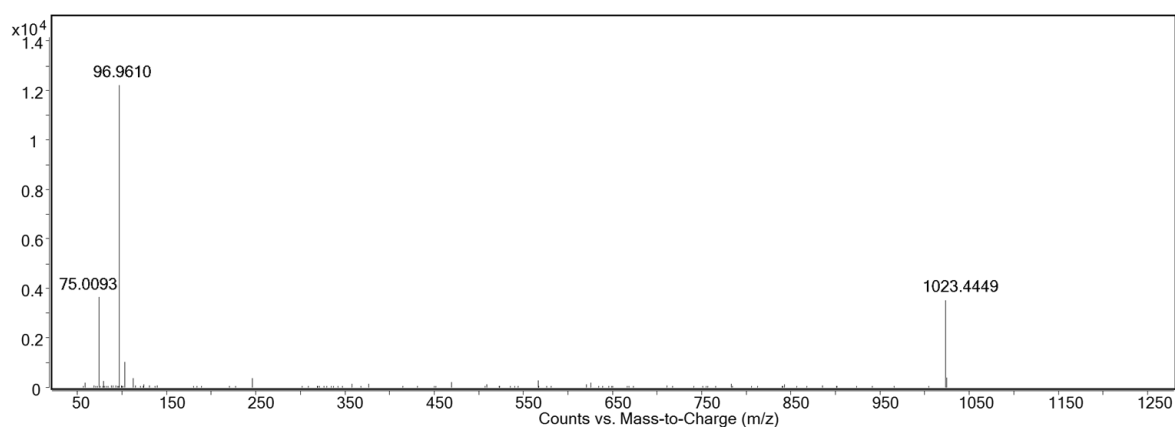

**Figure S4.** ESI<sup>-</sup> Targeted MS/MS analysis of the putative gambierone analogue selecting [M-H]<sup>-</sup> ion in *G. australes* at 6.08 min.  $m/z$  measured values for the putative gambierone analogue and  $\Delta$  ppm calculated in base of gambierone theoretical values.

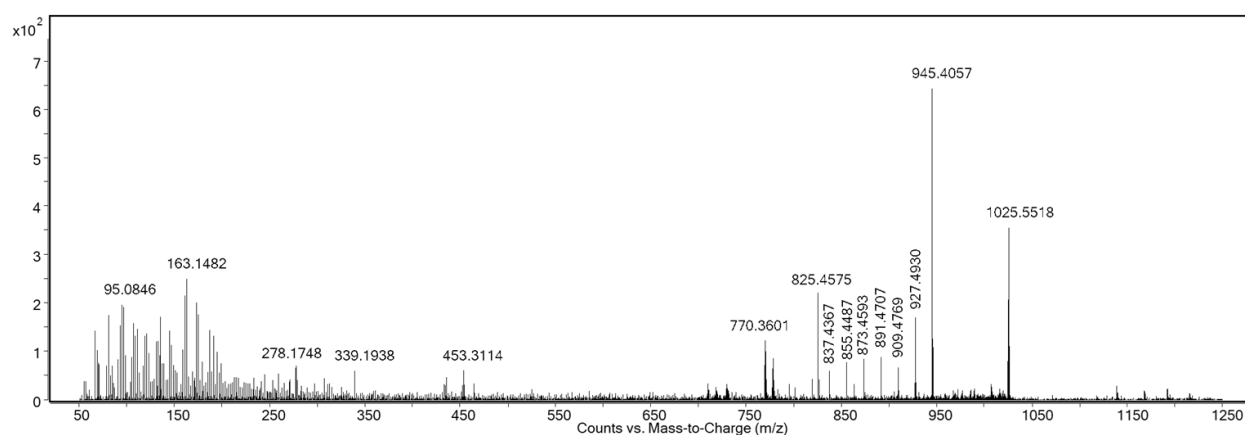

**Figure S5.** ESI<sup>+</sup> Targeted MS/MS analysis of the putative gambierone analogue selecting [M+H]<sup>+</sup> ion in *G. australes* at 6.08 min.

**Table S4.** Accurate mass measurements for the putative gambierone analogue and  $\Delta$  ppm calculated in base of gambierone theoretical values.

| Ion                                                   | <i>m/z</i>               |                           | $\Delta$ ppm |
|-------------------------------------------------------|--------------------------|---------------------------|--------------|
|                                                       | Measured<br>p-Gambierone | Theoretical<br>Gambierone |              |
| [M+H] <sup>+</sup>                                    | 1025.5518                | 1025.4774                 | +72.6        |
| [M+H-H <sub>2</sub> O] <sup>+</sup>                   | n.d.                     | 1007.4668                 | n.d.         |
| [M+H-2H <sub>2</sub> O] <sup>+</sup>                  | n.d.                     | 989.4563                  | n.d.         |
| [M-SO <sub>3</sub> +H] <sup>+</sup>                   | 945.4057                 | 945.5206                  | -121.5       |
| [M-SO <sub>3</sub> -H <sub>2</sub> O+H] <sup>+</sup>  | 927.4930                 | 927.5100                  | -18.4        |
| [M-SO <sub>3</sub> -2H <sub>2</sub> O+H] <sup>+</sup> | 909.4769                 | 909.4995                  | -24.8        |
| [M-SO <sub>3</sub> -3H <sub>2</sub> O+H] <sup>+</sup> | 891.4707                 | 891.4889                  | -20.4        |
| [M-SO <sub>3</sub> -4H <sub>2</sub> O+H] <sup>+</sup> | 873.4593                 | 873.4783                  | -21.8        |
| [M-SO <sub>3</sub> -5H <sub>2</sub> O+H] <sup>+</sup> | 855.4487                 | 855.4678                  | -22.3        |
| [M-SO <sub>3</sub> -6H <sub>2</sub> O+H] <sup>+</sup> | 837.4367                 | 837.4572                  | -24.5        |



**Table S5.** Accurate mass measurements using LC-HRMS full scan analysis in ESI<sup>-</sup> and ESI<sup>+</sup> mode for putative gambieroxide.

| Specie              | Sample ID       | Injection N° | ESI <sup>+</sup> p-gambieroxide     |                            |                                   |                            |                          | ESI <sup>-</sup> p-gambieroxide |                            |                      |
|---------------------|-----------------|--------------|-------------------------------------|----------------------------|-----------------------------------|----------------------------|--------------------------|---------------------------------|----------------------------|----------------------|
|                     |                 |              | [M+H-H <sub>2</sub> O] <sup>+</sup> | [M+H] <sup>+</sup>         | Ion                               |                            |                          | Retention time (min)            | [M-H] <sup>-</sup>         | Retention time (min) |
|                     |                 |              |                                     |                            | [M+NH <sub>4</sub> ] <sup>+</sup> | [M+Na] <sup>+</sup>        | [M+K] <sup>+</sup>       |                                 |                            |                      |
| <i>G. australes</i> | IRTA-SMN-17-189 | R1           | n.d.                                | n.d.                       | 1212.6013<br>(Δppm = +2.5)        | 1217.5541<br>(Δppm = +0.3) | 1233.5200 (Δppm = -6.2)  | 5.32                            | 1193.5582<br>(Δppm = +0.8) | 5.32                 |
|                     |                 | R2           | n.d.                                | n.d.                       | 1212.6009<br>(Δppm = +2.1)        | 1217.5554<br>(Δppm = +1.4) | 1233.5098 (Δppm = -14.4) | 5.32                            | 1193.5590<br>(Δppm = +1.5) | 5.32                 |
|                     |                 | R3           | n.d.                                | n.d.                       | 1212.6004<br>(Δppm = +1.7)        | 1217.5530<br>(Δppm = -0.6) | 1233.5375 (Δppm = +8.0)  | 5.32                            | 1193.5587<br>(Δppm = +1.3) | 5.31                 |
|                     | IRTA-SMN-17-253 | R1           | 1177.5674 (Δppm = +5.3)             | n.d.                       | 1212.6041<br>(Δppm = +4.8)        | 1217.5577<br>(Δppm = +3.3) | 1233.5290 (Δppm = +1.1)  | 5.31                            | 1193.5603<br>(Δppm = +2.6) | 5.31                 |
|                     |                 | R2           | 1177.5738 (Δppm = +10.7)            | n.d.                       | 1212.6037<br>(Δppm = +4.5)        | 1217.5579<br>(Δppm = +3.4) | 1233.5280 (Δppm = +0.3)  | 5.31                            | 1193.5600<br>(Δppm = +2.3) | 5.31                 |
|                     |                 | R3           | 1177.5616 (Δppm = +0.3)             | n.d.                       | 1212.6034<br>(Δppm = +4.2)        | 1217.5567<br>(Δppm = +2.5) | 1233.5193 (Δppm = -6.7)  | 5.31                            | 1193.5600<br>(Δppm = +2.3) | 5.31                 |
|                     | IRTA-SMN-17-244 | R1           | 1177.5698 (Δppm = +7.3)             | n.d.                       | 1212.6036<br>(Δppm = +4.4)        | 1217.5568<br>(Δppm = +2.5) | 1233.5313 (Δppm = +3.0)  | 5.30                            | 1193.5593<br>(Δppm = +1.8) | 5.32                 |
|                     |                 | R2           | 1177.5616 (Δppm = +0.3)             | n.d.                       | 1212.6038<br>(Δppm = +4.5)        | 1217.5567<br>(Δppm = +2.5) | 1233.5211 (Δppm = -5.3)  | 5.32                            | 1193.5598<br>(Δppm = +2.2) | 5.32                 |
|                     |                 | R3           | 1177.5651 (Δppm = +3.3)             | n.d.                       | 1212.6037<br>(Δppm = +4.5)        | 1217.5570<br>(Δppm = +2.7) | 1233.5285 (Δppm = +0.7)  | 5.32                            | 1193.5598<br>(Δppm = +2.2) | 5.32                 |
|                     | IRTA-SMN-17-162 | R1           | 1177.5419 (Δppm = -16.4)            | 1195.5886 (Δppm = +14.1)   | 1212.6021<br>(Δppm = +3.1)        | 1217.5561<br>(Δppm = +2.0) | 1233.5187 (Δppm = -7.2)  | 5.32                            | 1193.5589<br>(Δppm = +1.4) | 5.32                 |
|                     |                 | R2           | 1177.5402 (Δppm = -17.8)            | n.d.                       | 1212.6021<br>(Δppm = +3.1)        | 1217.5559<br>(Δppm = +1.8) | 1233.5206 (Δppm = -5.7)  | 5.32                            | 1193.5593<br>(Δppm = +1.8) | 5.32                 |
|                     |                 | R3           | 1177.5454 (Δppm = -13.4)            | 1195.5818<br>(Δppm = +8.4) | 1212.6020<br>(Δppm = +3.1)        | 1217.5568<br>(Δppm = +2.5) | 1233.5254 (Δppm = -1.8)  | 5.32                            | 1193.5594<br>(Δppm = +1.8) | 5.32                 |
|                     | IRTA-SMN-17-164 | R1           | 1177.5604 (Δppm = -0.7)             | n.d.                       | 1212.6019<br>(Δppm = +3.0)        | 1217.5553<br>(Δppm = +1.3) | 1233.5263 (Δppm = -1.1)  | 5.31                            | 1193.5591<br>(Δppm = +1.6) | 5.32                 |
|                     |                 | R2           | 1177.5645 (Δppm = +2.8)             | n.d.                       | 1212.6020<br>(Δppm = +3.1)        | 1217.5554<br>(Δppm = +1.4) | 1233.5246 (Δppm = -2.4)  | 5.31                            | 1193.5595<br>(Δppm = +1.9) | 5.32                 |
|                     |                 | R3           | 1177.5644 (Δppm = +2.7)             | n.d.                       | 1212.5983<br>(Δppm = 0.0)         | 1217.5537<br>(Δppm = 0.0)  | 1233.5210 (Δppm = -5.4)  | 5.31                            | 1193.5592<br>(Δppm = +1.7) | 5.30                 |



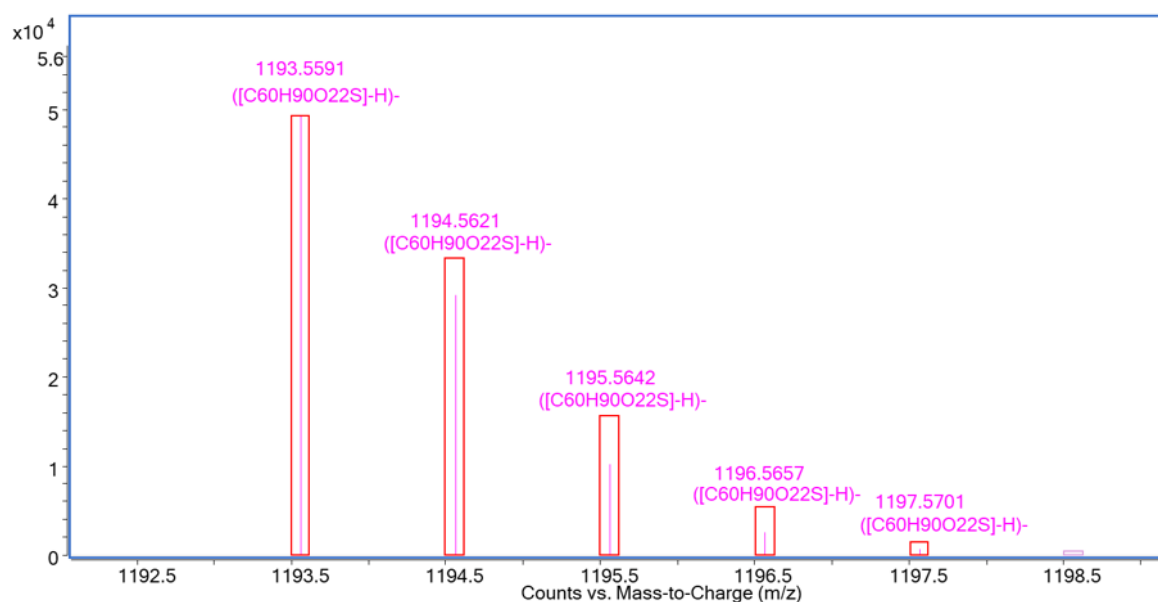

**Figure S6.** ESI<sup>-</sup> LC-HRMS full scan analysis of putative gambieroxide detected in *G. australes* at 5.32 min.

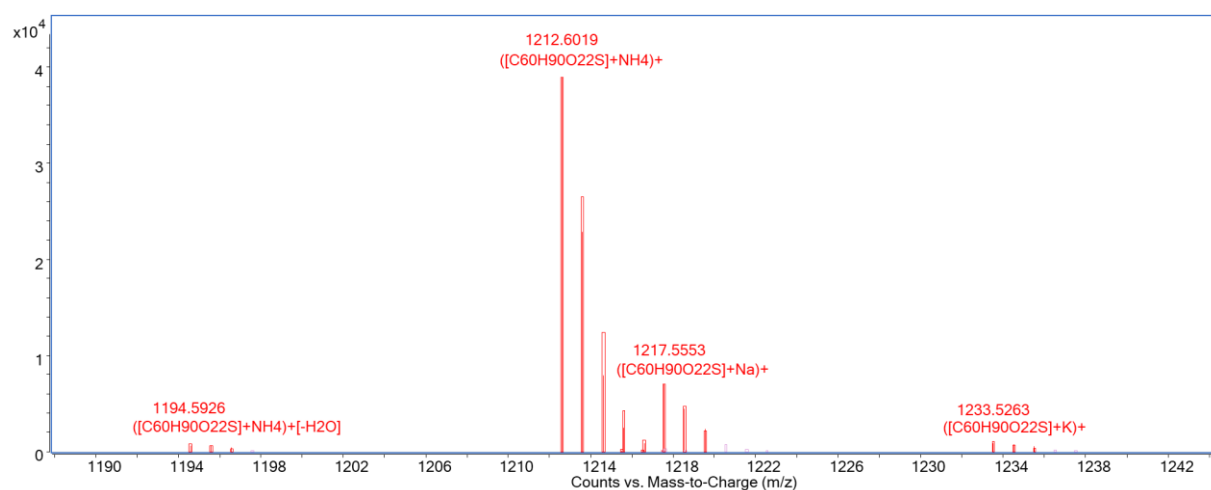

**Figure S7.** ESI<sup>+</sup> LC-HRMS full scan analysis of putative gambieroxide detected in *G. australes* at 5.32 min.

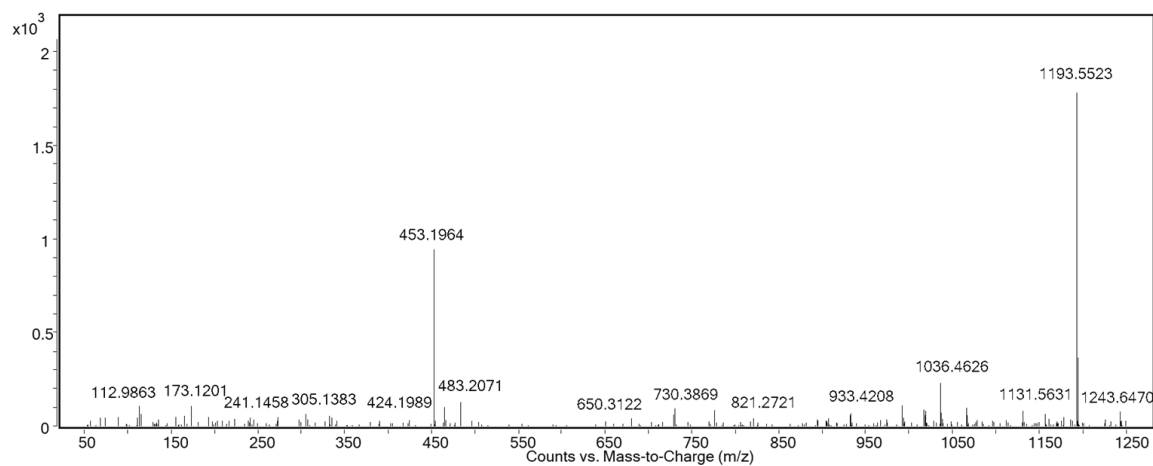

**Figure S8.** ESI<sup>-</sup> targeted HRMS/MS spectrum of putative gambieroxide selecting [M-H]<sup>-</sup> ion in *G. australes* at a collision energy of 50 eV.

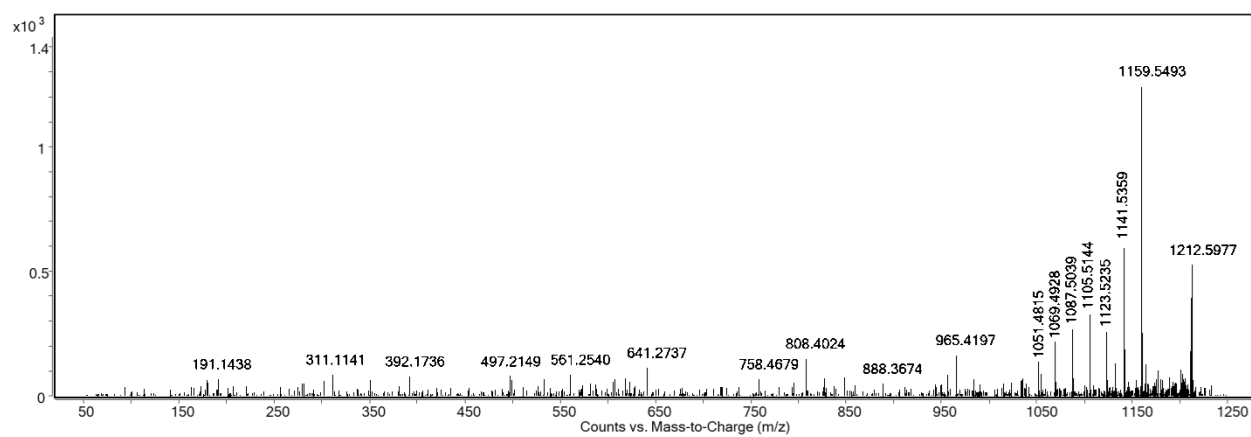

**Figure S9.** ESI<sup>+</sup> Targeted HRMS/MS spectrum of putative gambieroxide selecting [M+H]<sup>+</sup> ion in *G. australes* at a collision energy of 20 eV.

**Table S6.** Accurate mass measurements using LC-HRMS full scan analysis in ESI<sup>-</sup> and ESI<sup>+</sup> mode for putative gambieric acid C.

| Specie              | Sample ID       | Injection N° | ESI <sup>+</sup> Gambieric Acid C |                                   |                         | Retention time (min) | ESI <sup>-</sup> Gambieric Acid C |                      |
|---------------------|-----------------|--------------|-----------------------------------|-----------------------------------|-------------------------|----------------------|-----------------------------------|----------------------|
|                     |                 |              | Ion                               |                                   |                         |                      | Ion [M-H] <sup>-</sup>            | Retention time (min) |
|                     |                 |              | [M+H] <sup>+</sup>                | [M+NH <sub>4</sub> ] <sup>+</sup> | [M+Na] <sup>+</sup>     |                      |                                   |                      |
| <i>G. australes</i> | IRTA-SMN-17-189 | R1           | 1185.6961 (Δppm = +2.4)           | 1202.722 (Δppm = +1.9)            | 1207.6751 (Δppm = 0.0)  | 8.90                 | 1183.6785 (Δppm = -0.1)           | 8.90                 |
|                     |                 | R2           | 1185.6969 (Δppm = +3.1)           | 1202.7232 (Δppm = +2.9)           | 1207.6776 (Δppm = +2.1) | 8.88                 | 1183.6774 (Δppm = -1.0)           | 8.88                 |
|                     |                 | R3           | 1185.6959 (Δppm = +2.3)           | 1202.7222 (Δppm = +2.1)           | 1207.6766 (Δppm = +1.2) | 8.88                 | 1183.6776 (Δppm = -0.8)           | 8.88                 |
|                     | IRTA-SMN-17-253 | R1           | 1185.6945 (Δppm = +1.1)           | 1202.7217 (Δppm = +1.7)           | 1207.6751 (Δppm = 0.0)  | 8.89                 | 1183.6774 (Δppm = -1.0)           | 8.89                 |
|                     |                 | R2           | 1185.6943 (Δppm = +0.9)           | 1202.7197 (Δppm = 0.0)            | 1207.6765 (Δppm = +1.2) | 8.89                 | 1183.6778 (Δppm = -0.7)           | 8.89                 |
|                     |                 | R3           | 1185.6908 (Δppm = -2.0)           | 1202.7207 (Δppm = +0.8)           | 1207.6749 (Δppm = -0.2) | 8.89                 | 1183.6769 (Δppm = -1.4)           | 8.89                 |
|                     | IRTA-SMN-17-244 | R1           | 1185.6944 (Δppm = +1.0)           | 1202.7215 (Δppm = +1.5)           | 1207.6762 (Δppm = +0.9) | 8.90                 | 1183.6774 (Δppm = -1.0)           | 8.90                 |
|                     |                 | R2           | 1185.6940 (Δppm = +0.7)           | 1202.7202 (Δppm = +0.4)           | 1207.6766 (Δppm = +1.2) | 8.89                 | 1183.6768 (Δppm = -1.5)           | 8.90                 |
|                     |                 | R3           | 1185.6945 (Δppm = +1.1)           | 1202.721 (Δppm = +1.1)            | 1207.6751 (Δppm = 0.0)  | 8.89                 | 1183.6771 (Δppm = -1.3)           | 8.88                 |
|                     | IRTA-SMN-17-162 | R1           | 1185.6875 (Δppm = -4.8)           | 1202.7193 (Δppm = -0.3)           | 1207.6779 (Δppm = +2.3) | 8.89                 | 1183.6763 (Δppm = -1.9)           | 8.90                 |
|                     |                 | R2           | 1185.6875 (Δppm = -4.8)           | 1202.7188 (Δppm = -0.7)           | 1207.6751 (Δppm = 0.0)  | 8.89                 | 1183.6763 (Δppm = -1.9)           | 8.90                 |
|                     |                 | R3           | n.d.                              | n.d.                              | n.d.                    | n.d.                 | 1183.6767 (Δppm = -1.6)           | 8.88                 |
|                     | IRTA-SMN-17-164 | R1           | 1185.6923 (Δppm = -0.8)           | 1202.7178 (Δppm = -1.6)           | 1207.6798 (Δppm = +3.9) | 8.89                 | 1183.6764 (Δppm = -1.9)           | 8.89                 |
|                     |                 | R2           | 1185.6929 (Δppm = -0.3)           | 1202.7203 (Δppm = +0.5)           | 1207.6756 (Δppm = +0.4) | 8.89                 | 1183.6757 (Δppm = -2.4)           | 8.90                 |
|                     |                 | R3           | 1185.6945 (Δppm = +1.1)           | 1202.721 (Δppm = +1.1)            | 1207.6751 (Δppm = 0.0)  | 8.89                 | 1183.6756 (Δppm = -2.5)           | 8.88                 |

|                       |                 |    |                                  |                                  |                                  |      |                                  |      |
|-----------------------|-----------------|----|----------------------------------|----------------------------------|----------------------------------|------|----------------------------------|------|
|                       | IRTA-SMN-17-271 | R1 | 1185.6958 ( $\Delta$ ppm = +2.2) | 1202.7218 ( $\Delta$ ppm = +1.7) | 1207.6758 ( $\Delta$ ppm = +0.6) | 8.90 | 1183.6782 ( $\Delta$ ppm = -0.3) | 8.88 |
|                       |                 | R2 | 1185.6963 ( $\Delta$ ppm = +2.6) | 1202.7223 ( $\Delta$ ppm = +2.2) | 1207.6753 ( $\Delta$ ppm = +0.2) | 8.88 | 1183.6778 ( $\Delta$ ppm = -0.7) | 8.88 |
|                       |                 | R3 | 1185.6967 ( $\Delta$ ppm = +3.0) | 1202.7227 ( $\Delta$ ppm = +2.5) | 1207.6766 ( $\Delta$ ppm = +1.2) | 8.89 | 1183.6780 ( $\Delta$ ppm = -0.5) | 8.88 |
| <i>G. excentricus</i> | IRTA-SMN-17-407 | R1 | n.d.                             | n.d.                             | n.d.                             | n.d. | n.d.                             | n.d. |
|                       |                 | R2 | n.d.                             | n.d.                             | n.d.                             | n.d. | n.d.                             | n.d. |
|                       |                 | R3 | n.d.                             | n.d.                             | n.d.                             | n.d. | n.d.                             | n.d. |
| <i>F. paulensis</i>   | IRTA-SMN-17-209 | R1 | n.d.                             | n.d.                             | n.d.                             | n.d. | n.d.                             | n.d. |
|                       |                 | R2 | n.d.                             | n.d.                             | n.d.                             | n.d. | n.d.                             | n.d. |
|                       |                 | R3 | n.d.                             | n.d.                             | n.d.                             | n.d. | n.d.                             | n.d. |
| <i>G. sp 2</i>        | 0010G-CR-CCAUTH | R1 | n.d.                             | n.d.                             | n.d.                             | n.d. | n.d.                             | n.d. |
|                       |                 | R2 | n.d.                             | n.d.                             | n.d.                             | n.d. | n.d.                             | n.d. |
|                       |                 | R3 | n.d.                             | n.d.                             | n.d.                             | n.d. | n.d.                             | n.d. |

**Table S7.** Accurate mass measurements using LC-HRMS full scan analysis in ESI<sup>-</sup> and ESI<sup>+</sup> mode for putative gambieric acid D.

| Specie              | Sample ID       | Injection N° | ESI <sup>+</sup> Gambieric Acid D |                                   |                                  | Retention time (min) | ESI <sup>-</sup> Gambieric Acid D |                      |
|---------------------|-----------------|--------------|-----------------------------------|-----------------------------------|----------------------------------|----------------------|-----------------------------------|----------------------|
|                     |                 |              | Ion                               |                                   |                                  |                      | Ion [M-H] <sup>-</sup>            | Retention time (min) |
|                     |                 |              | [M+H] <sup>+</sup>                | [M+NH <sub>4</sub> ] <sup>+</sup> | [M+Na] <sup>+</sup>              |                      |                                   |                      |
| <i>G. australes</i> | IRTA-SMN-17-189 | R1           | 1199.7105 ( $\Delta$ ppm = +1.4)  | 1216.7374 ( $\Delta$ ppm = +1.6)  | 1221.6926 ( $\Delta$ ppm = +1.5) | 8.93                 | 1197.6925 ( $\Delta$ ppm = -1.5)  | 8.93                 |
|                     |                 | R2           | 1199.7099 ( $\Delta$ ppm = +0.9)  | 1216.7370 ( $\Delta$ ppm = +1.3)  | 1221.6918 ( $\Delta$ ppm = +0.8) | 8.93                 | 1197.6921 ( $\Delta$ ppm = -1.8)  | 8.93                 |
|                     |                 | R3           | 1199.7098 ( $\Delta$ ppm = +0.8)  | 1216.7368 ( $\Delta$ ppm = +1.2)  | 1221.6917 ( $\Delta$ ppm = +0.7) | 8.93                 | 1197.6922 ( $\Delta$ ppm = -1.8)  | 8.92                 |
|                     | IRTA-SMN-17-253 | R1           | 1199.7092 ( $\Delta$ ppm = +0.3)  | 1216.7359 ( $\Delta$ ppm = +0.4)  | 1221.6918 ( $\Delta$ ppm = +0.8) | 8.93                 | 1197.6920 ( $\Delta$ ppm = -1.9)  | 8.92                 |
|                     |                 | R2           | 1199.7101 ( $\Delta$ ppm = +1.1)  | 1216.7363 ( $\Delta$ ppm = +0.7)  | 1221.6925 ( $\Delta$ ppm = +1.4) | 8.93                 | 1197.6924 ( $\Delta$ ppm = -1.6)  | 8.92                 |
|                     | IRTA-SMN-17-244 | R3           | 1199.7095 ( $\Delta$ ppm = +0.6)  | 1216.7361 ( $\Delta$ ppm = +0.6)  | 1221.6920 ( $\Delta$ ppm = +1.0) | 8.93                 | 1197.6920 ( $\Delta$ ppm = -1.9)  | 8.93                 |
|                     |                 | R1           | 1199.7092 ( $\Delta$ ppm = +0.3)  | 1216.7359 ( $\Delta$ ppm = +0.4)  | 1221.6918 ( $\Delta$ ppm = +0.8) | 8.93                 | 1197.6926 ( $\Delta$ ppm = -1.4)  | 8.93                 |



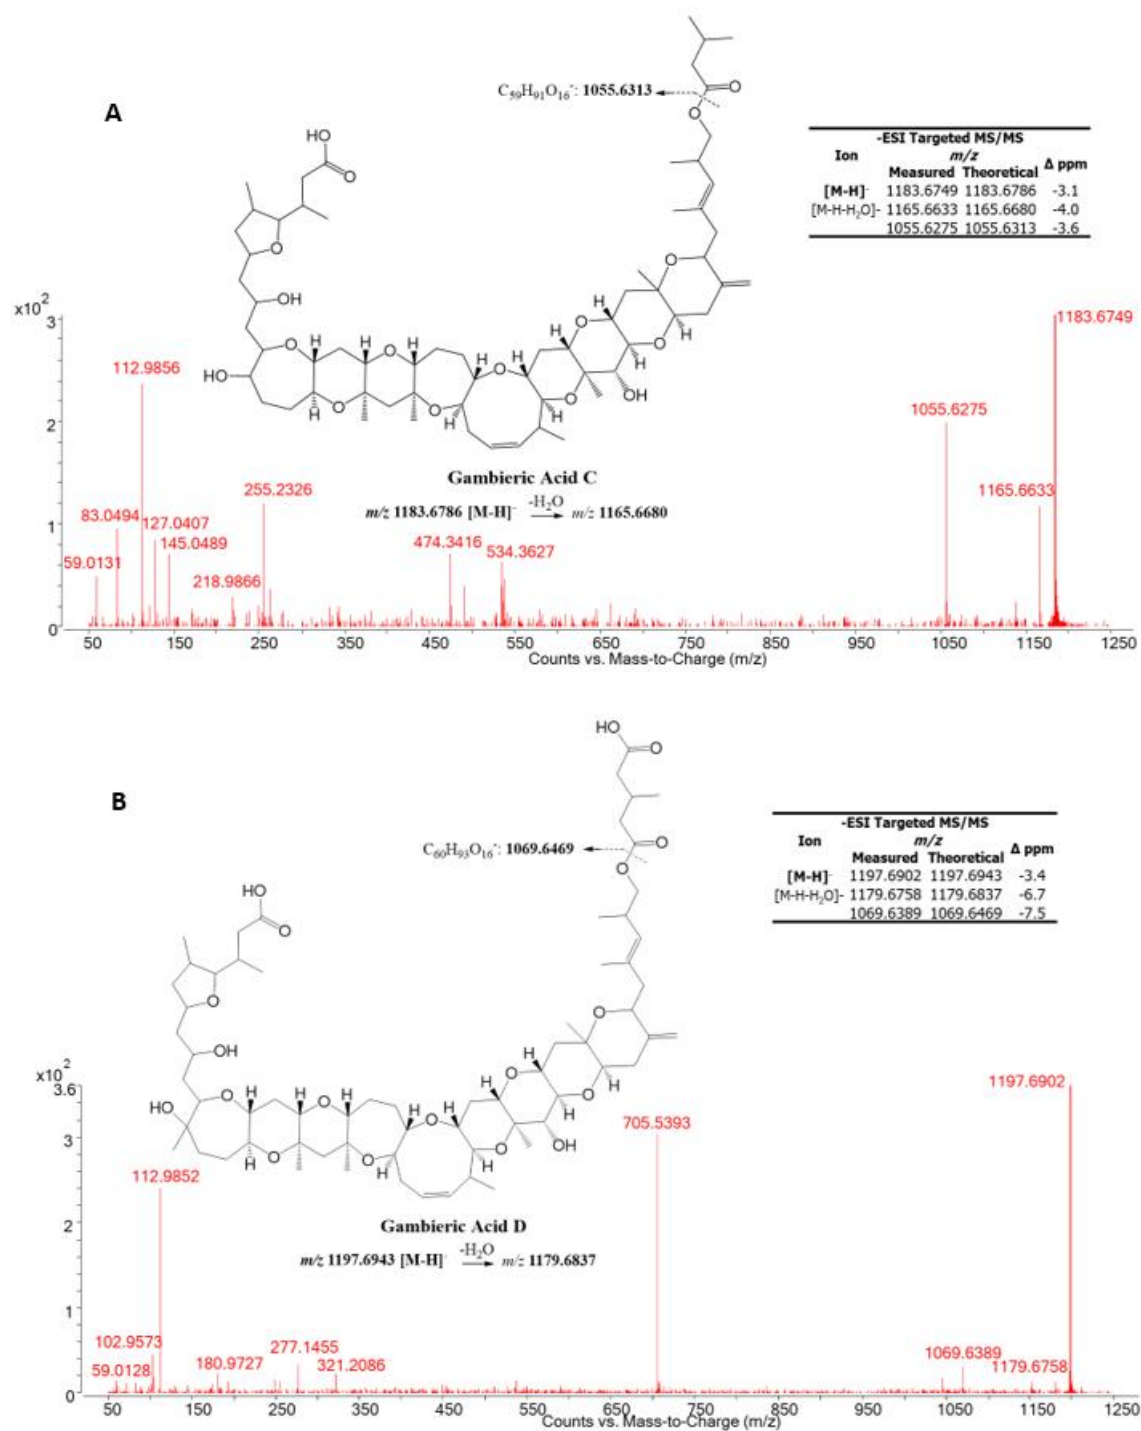

**Figure S10.** ESI Targeted MS/MS spectra at an average of 20, 40 and 60 eV of: (A) gambieric acid C; (B) gambieric acid D detected in *G. australes*.



Table S8. MRM transitions monitored using the LC-MS API 4000 QTrap.

| Compound                        | Retention time (min)* | ESI | MRM Transitions Q1/Q3 (m/z)                                              | CE (ev)       | CXP (ev) |     |
|---------------------------------|-----------------------|-----|--------------------------------------------------------------------------|---------------|----------|-----|
| MTX1                            | 6.29*                 | -   | [M-2H] <sup>2-</sup> /[M-2H] <sup>2-</sup>                               | 1689.8/1689.8 | -40      | -15 |
|                                 |                       |     | [M-2H] <sup>2-</sup> /[HOSO <sub>3</sub> ] <sup>-</sup>                  | 1689.8/96.9   | -125     | -21 |
| MTX2                            | Unknown               | -   | [M-2H] <sup>2-</sup> /[HOSO <sub>3</sub> ] <sup>-</sup>                  | 1637.5/96.9   | -25      | -21 |
|                                 |                       |     | [M-3H] <sup>3-</sup> /[HOSO <sub>3</sub> ] <sup>-</sup>                  | 1091.5/96.9   | -125     | -21 |
|                                 |                       |     | [M-H] <sup>-</sup> /[M-H] <sup>-</sup>                                   | 1037.6/1037.6 | -40      | -15 |
|                                 |                       |     | [M-H] <sup>-</sup> /[HOSO <sub>3</sub> ] <sup>-</sup>                    | 1037.6/96.8   | -125     | -21 |
| MTX3                            | 6.19*§                | +   | [M+H] <sup>+</sup> /[M+H-H <sub>2</sub> O] <sup>+</sup>                  | 1039.5/1021.5 | 25       | 15  |
|                                 |                       |     | [M+H] <sup>+</sup> /[M-SO <sub>3</sub> -H <sub>2</sub> O+H] <sup>+</sup> | 1039.5/941.5  | 35       | 15  |
|                                 |                       |     |                                                                          | 1039.5/233.1  | 60       | 21  |
|                                 |                       |     |                                                                          | 1039.5/109.0  | 80       | 21  |
|                                 |                       |     |                                                                          |               |          |     |
| MTX4                            | 6.08*                 | -   | [M-2H] <sup>2-</sup> /[M-2H] <sup>2-</sup>                               | 1646.2/1646.2 | -40      | -15 |
|                                 |                       |     | [M-2H] <sup>2-</sup> /[HOSO <sub>3</sub> ] <sup>-</sup>                  | 1646.2/96.9   | -125     | -21 |
| desulfo-MTX1                    | Unknown               | -   | [M-2H] <sup>2-</sup> /[M-2H] <sup>2-</sup>                               | 1649.8/1649.8 | -40      | -15 |
|                                 |                       |     | [M-2H] <sup>2-</sup> /[HOSO <sub>3</sub> ] <sup>-</sup>                  | 1649.8/96.9   | -125     | -21 |
| didehydro-demethyl-desulfo-MTX1 | Unknown               | -   | [M-2H] <sup>2-</sup> /[M-2H] <sup>2-</sup>                               | 1641.8/1641.8 | -40      | -15 |
|                                 |                       |     | [M-2H] <sup>2-</sup> /[HOSO <sub>3</sub> ] <sup>-</sup>                  | 1641.8/96.9   | -125     | -21 |
|                                 |                       |     | [M-H] <sup>-</sup> /[M-H] <sup>-</sup>                                   | 1023.5/1023.5 | -40      | -15 |
|                                 |                       |     | [M-H] <sup>-</sup> /[HOSO <sub>3</sub> ] <sup>-</sup>                    | 1023.6/96.8   | -125     | -21 |
| Gambierone                      | 5.94§                 | +   | [M+H] <sup>+</sup> /[M+H-H <sub>2</sub> O] <sup>+</sup>                  | 1025.5/1007.5 | 25       | 15  |
|                                 |                       |     | [M+H] <sup>+</sup> /[M-SO <sub>3</sub> -H <sub>2</sub> O+H] <sup>+</sup> | 1025.5/927.5  | 35       | 15  |
|                                 |                       |     |                                                                          | 1025.5/219.1  | 60       | 21  |
|                                 |                       |     |                                                                          | 1025.5/109.0  | 80       | 21  |

\*MTX1 from Wako and samples from a previous study in our laboratory [11] served as reference materials for retention time; § comparison of retention times of gambierone and 44-methyl gambierone (=MTX3) in *G. belizeanus* and *G. australes* served for qualitative identification of these two analogues: since [13] and [14] simultaneously isolated MTX3 independently from *G. belizeanus* and *G. australes*, respectively, the analogue with identical mass and retention time in both species was considered authentic MTX3. A *G. belizeanus* sample from a previous study [11] served as reference material for gambierone.
